# Supplementary material
Source: PubMed Central journal article supplement (PMC3718098)
Supplement: 1310880110_pnas.201310880SI.pdf [file 1310880110_pnas.201310880SI.pdf]

# Supporting Information

Isbell et al. 10.1073/pnas.1310880110

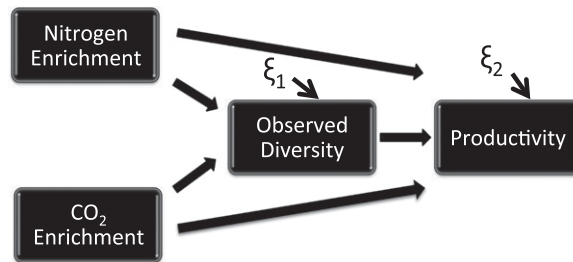

**Fig. S1.** Structural equation model. The top and bottom arrows respectively show the direct effects of N and CO<sub>2</sub> enrichment on productivity. The indirect effect of N (or CO<sub>2</sub>) enrichment is the product of the effect of N (or CO<sub>2</sub>) enrichment on observed diversity, and the effect of observed diversity on productivity. N and CO<sub>2</sub> enrichment treatments were coded as a binary variable that indicated the ambient (0) or enriched (1) treatment level; observed diversity was quantified the mean number of species observed in peak biomass samples and percent cover estimates; and productivity was the peak aboveground community biomass in the mixture. Productivity and observed diversity were ln-transformed to meet linear model assumptions. The model was fit to species mixture data separately within each year of the experiment. Direct and indirect effects are reported in Fig. 2 C and D. Further details in *Methods*.

**Table S1. BioCON experiment treatment effects on productivity and observed number of species**

| Source                      | Productivity               | Observed no. of species      |
|-----------------------------|----------------------------|------------------------------|
| CO <sub>2</sub> (C)         | $F_{1,4} = 7.70^*$         | $F_{1,4} = 0.59$             |
| Nitrogen (N)                | $F_{1,156} = 16.29^{***}$  | $F_{1,156} = 30.32^{***}$    |
| Planted diversity (D)       | $F_{1,156} = 40.18^{***}$  | $F_{1,156} = 1863.57^{***}$  |
| Log <sub>e</sub> (Year) (Y) | $F_{1,2056} = 9.23^{**}$   | $F_{1,2056} = 1205.19^{***}$ |
| C × N                       | $F_{1,156} = 0.01$         | $F_{1,156} = 3.21$           |
| C × D                       | $F_{1,156} = 1.87$         | $F_{1,156} = 0.13$           |
| N × D                       | $F_{1,156} = 10.98^{**}$   | $F_{1,156} = 8.92^{**}$      |
| C × Y                       | $F_{1,2056} = 0.08$        | $F_{1,2056} = 1.06$          |
| N × Y                       | $F_{1,2056} = 5.53^*$      | $F_{1,2056} = 2.36$          |
| D × Y                       | $F_{1,2056} = 31.91^{***}$ | $F_{1,2056} = 623.21^{***}$  |
| C × N × D                   | $F_{1,156} = 0.02$         | $F_{1,156} = 0.40$           |
| C × N × Y                   | $F_{1,2056} = 0.26$        | $F_{1,2056} = 1.00$          |
| C × D × Y                   | $F_{1,2056} = 0.16$        | $F_{1,2056} = 0.60$          |
| N × D × Y                   | $F_{1,2056} = 7.79^{**}$   | $F_{1,2056} = 20.52^{***}$   |
| C × N × D × Y               | $F_{1,2056} = 0.02$        | $F_{1,2056} = 0.58$          |

\* $P \leq 0.05$ ; \*\* $P \leq 0.01$ ; \*\*\* $P \leq 0.001$ .
